# Supplementary material for: New Insights into Placozoan Sexual Reproduction and Development
Source: PLOS journal article supplement (doi:10.1371/journal.pone.0019639), 2011-05-19

**Figure S1. Neighbor Joining trees (BioNJ) of DnaJ (A) and Nme (B) protein domains.**

The *Trichoplax adhaerens* Dnajb13 and Nme5 proteins clearly group to corresponding known family subgroups (green branches). *Trichoplax adhaerens* and *Nematostella vectensis* proteins are marked with blue and red branches, respectively.

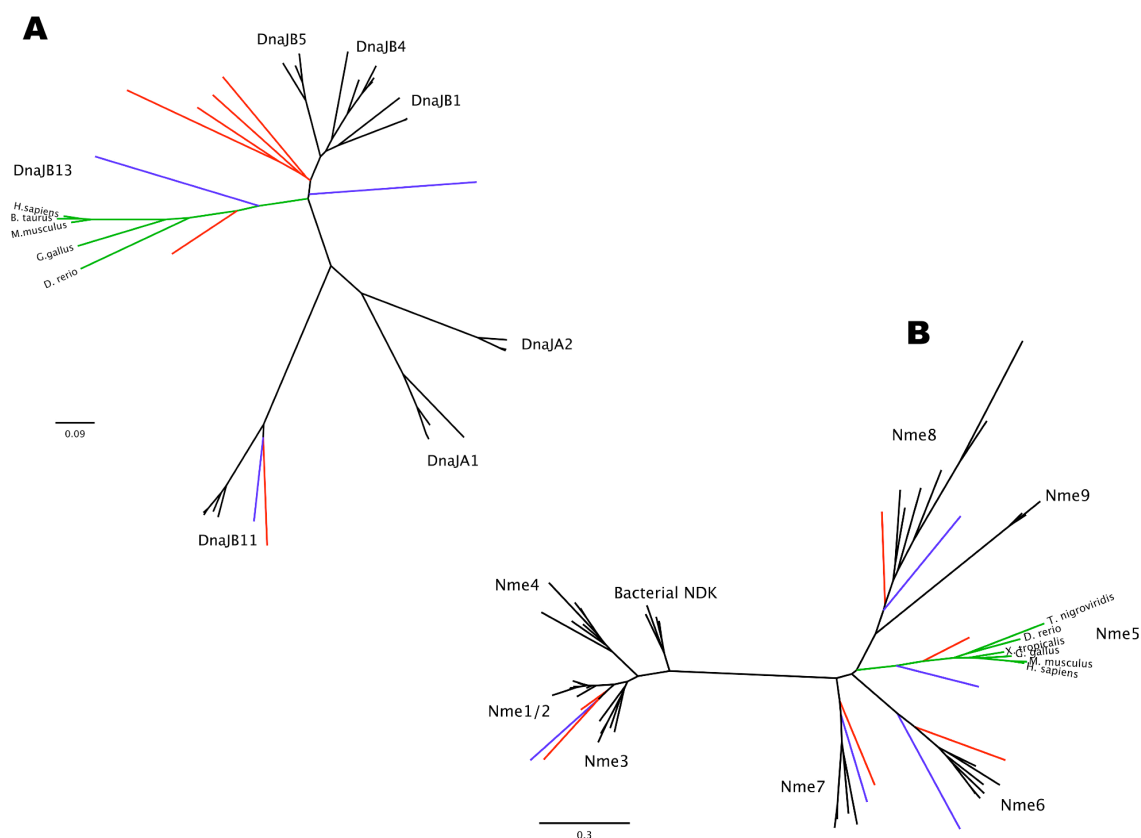

Supplement: S1 (10.1371/journal.pone.0019639.s001) [file journal.pone.0019639.s001]
